# Supplementary material for: Humidity-dependent wound sealing in succulent leaves of Delosperma cooperi – An adaptation to seasonal drought stress
Source: PubMed Central journal article supplement (PMC5789399; doi:10.3762/bjnano.9.20), 2018-01-16
Supplement: Beilstein_J_Nanotechnol-09-175-s003.pdf [file Beilstein_J_Nanotechnol-09-175-s003.pdf]

## Supporting Information

for

# **Humidity-dependent wound sealing in succulent leaves of *Delosperma cooperi* – An adaptation to seasonal drought stress**

Olga Speck<sup>\*1,2,3</sup>, Mark Schlechtendahl<sup>1,4</sup>, Florian Borm<sup>1</sup>, Tim Kampowski<sup>1,4</sup>, and Thomas Speck<sup>1,2,3,4</sup>

Address: <sup>1</sup>Plant Biomechanics Group, Botanic Garden, Faculty of Biology, University of Freiburg, Schänzlestraße 1, 79104 Freiburg, Germany, <sup>2</sup>Competence Network Biomimetics, Baden-Württemberg, Schänzlestraße 1, 79104 Freiburg, Germany, <sup>3</sup>Freiburg Center for Interactive Materials and Bioinspired Technologies (FIT), University of Freiburg, Georges-Köhler-Allee 105, 79110 Freiburg, Germany, and <sup>4</sup>Freiburg Materials Research Center (FMF), University of Freiburg, Stefan-Meier-Str. 21, 79104 Freiburg, Germany

Email: Olga Speck - [olga.speck@biologie.uni-freiburg.de](mailto:olga.speck@biologie.uni-freiburg.de)

\* Corresponding author

## **Additional statistical analysis**

Statistical analysis concerning the influence of “humidity conditions in the wound region” (relative air humidity and water droplet) and “time after wounding” on the relative bending angle.

| <b>Two-way repeated measures ANOVA on rank-transformed data*</b>               |                         |         |         |            |                 |
|--------------------------------------------------------------------------------|-------------------------|---------|---------|------------|-----------------|
|                                                                                | Df                      | SS      | MS      | <i>F</i>   | <i>p</i> -value |
| “Humidity conditions in the wound region”                                      | 3                       | 3187050 | 1062350 | 73.31      | $p < 0.001$     |
| “Time after wounding”                                                          | 5                       | 265535  | 53107   | 29.86      | $p < 0.001$     |
| “Humidity conditions in the wound region” vs “Time after wounding”             | 15                      | 766988  | 51133   | 40.51      | $p < 0.001$     |
| <b>Post-hoc testing: pairwise comparisons using Student’s <i>t</i>-tests**</b> |                         |         |         |            |                 |
| “Humidity conditions in the wound region”                                      | 24% r.h. vs 49% r.h.    |         |         |            | $p < 0.001$     |
|                                                                                | 24% r.h. vs 100% r.h.   |         |         |            | $p < 0.001$     |
|                                                                                | 24% r.h. vs water drop  |         |         |            | $p < 0.001$     |
|                                                                                | 49% r.h. vs 100% r.h.   |         |         |            | $p < 0.001$     |
|                                                                                | 49% r.h. vs water drop  |         |         |            | $p < 0.001$     |
|                                                                                | 100% r.h. vs water drop |         |         |            | $p < 0.001$     |
| “Time after wounding”                                                          | 1 min vs 5 min          |         |         |            | $p < 0.001$     |
|                                                                                | 1 min vs 10 min         |         |         |            | $p < 0.001$     |
|                                                                                | 1 min vs 20 min         |         |         |            | $p < 0.001$     |
|                                                                                | 1 min vs 40 min         |         |         |            | $p < 0.001$     |
|                                                                                | 1 min vs 55 min         |         |         |            | $p < 0.01$      |
|                                                                                | 5 min vs 10 min         |         |         |            | $p < 0.01$      |
|                                                                                | 5 min vs 20 min         |         |         |            | $p < 0.05$      |
|                                                                                | 5 min vs 40 min         |         |         |            | $p > 0.05$      |
|                                                                                | 5 min vs 55 min         |         |         |            | $p > 0.05$      |
|                                                                                | 10 min vs 20 min        |         |         |            | $p > 0.05$      |
|                                                                                | 10 min vs 40 min        |         |         |            | $p > 0.05$      |
|                                                                                | 10 min vs 55 min        |         |         |            | $p > 0.05$      |
|                                                                                | 20 min vs 40 min        |         |         |            | $p > 0.05$      |
|                                                                                | 20 min vs 55 min        |         |         |            | $p > 0.05$      |
| 40 min vs 55 min                                                               |                         |         |         | $p > 0.05$ |                 |

\*A two-way repeated measures ANOVA on rank-transformed data was performed. The degrees of freedom (Df), sums of squares (SS), mean squares (MS), *F*-statistics and *p*-values of both the single main effects (‘humidity conditions in the wound region’ and ‘time after wounding’) and their interaction effect are presented.

\*\*For post-hoc testing, pairwise comparisons using Student’s *t*-tests and Bonferroni *p*-value adjustments were carried out in case of the single main effects. A graphic representation was used to post-hoc test their interaction effect (see Figure 3g). The required assumptions (normality of residuals and sphericity) have been met.
